# Supplementary material
Source: PubMed Central journal article supplement (PMC3727164)
Supplement: NIHMS480371-supplement-1.pdf [file NIHMS480371-supplement-1.pdf]

Analytical and Bioanalytical Chemistry

Electronic Supplementary Material

**Part II: Defining and Quantifying Individual and Co-cultured Intracellular Proteomes of Two Thermophilic Microorganisms by GeLC-MS<sup>2</sup> and Spectral Counting**

Muddiman, David; Andrews, Genna; Lewis, Derrick; Notey, Jaspreet; Kelly, Robert

**Table S1** List of unique *T. maritima* proteins identified having < 1% FDR and  $\geq 4$  spectral counts from the *T. maritima* culture grown at 75°C as compared with *T. maritima* proteins detected in the co-culture.

| <b>Tma Proteins Unique to Tma75 with <math>\geq 4</math> SpC, with respect to Co75_Tma</b> | <b>MW, kDa</b> | <b>SpC</b> | <b>Normalized SpC</b> |
|--------------------------------------------------------------------------------------------|----------------|------------|-----------------------|
| EFGL Elongation factor G-like protein                                                      | 75.8           | 85         | 0.00773               |
| Q9WZ17 Aspartokinase II                                                                    | 81.4           | 81         | 0.00681               |
| PORA Pyruvate synthase subunit porA                                                        | 44.1           | 68         | 0.01077               |
| ATPB ATP synthase subunit beta                                                             | 51.2           | 58         | 0.00770               |
| Q9WZD3 Cysteine synthase                                                                   | 31.1           | 51         | 0.01088               |
| Q9X1E6 Putative uncharacterized protein                                                    | 53.6           | 50         | 0.00648               |
| Q9WYB0 Fructose-bisphosphate aldolase                                                      | 34.9           | 44         | 0.00868               |
| Q9X1J8 Putative uncharacterized protein                                                    | 47.8           | 44         | 0.00673               |
| Q9WZZ9 SpoVS-related protein                                                               | 9.7            | 43         | 0.02935               |
| Q9WYM3 Putative uncharacterized protein                                                    | 47.0           | 39         | 0.00597               |
| Q9S5Y0 Response regulator DrrA                                                             | 28.4           | 38         | 0.00955               |
| ILVC Ketol-acid reductoisomerase                                                           | 38.0           | 38         | 0.00702               |
| SYL Leucyl-tRNA synthetase                                                                 | 95.5           | 37         | 0.00279               |
| Q9WZ19 Acetolactate synthase, small subunit                                                | 19.4           | 37         | 0.01344               |
| RS4 30S ribosomal protein S4                                                               | 24.7           | 36         | 0.01070               |
| Q9WXT1 Xylosidase                                                                          | 86.8           | 35         | 0.00279               |
| Q9WXN8 Oligopeptide ABC transporter, periplasmic oligopeptide-binding protein              | 69.9           | 35         | 0.00359               |
| Q9WXZ9 Putative uncharacterized protein                                                    | 24.4           | 34         | 0.00982               |
| Q9X0E9 SpoVS-related protein                                                               | 9.1            | 34         | 0.02427               |
| Q9X259 Purine nucleoside phosphorylase                                                     | 33.3           | 32         | 0.00665               |
| Q9X283 Transketolase, putative                                                             | 69.9           | 32         | 0.00313               |
| RL10 50S ribosomal protein L10                                                             | 20.3           | 32         | 0.01110               |
| EFTS Elongation factor Ts                                                                  | 22.8           | 30         | 0.00936               |
| SYI Isoleucyl-tRNA synthetase                                                              | 107.1          | 29         | 0.00196               |
| RS10 30S ribosomal protein S10                                                             | 11.6           | 29         | 0.01766               |
| RL5 50S ribosomal protein L5                                                               | 21.3           | 28         | 0.00945               |
| RL1 50S ribosomal protein L1                                                               | 25.9           | 27         | 0.00720               |
| KPRS Ribose-phosphate pyrophosphokinase                                                    | 34.9           | 26         | 0.00513               |
| ATPA ATP synthase subunit alpha                                                            | 56.0           | 25         | 0.00309               |
| GLGA Glycogen synthase                                                                     | 55.4           | 24         | 0.00307               |
| LEUD1 3-isopropylmalate dehydratase small subunit 1                                        | 18.7           | 24         | 0.00898               |
| RECA Protein recA                                                                          | 38.8           | 24         | 0.00419               |
| SYM Methionyl-tRNA synthetase                                                              | 72.9           | 24         | 0.00237               |
| PUR9 Bifunctional purine biosynthesis protein purH                                         | 49.8           | 23         | 0.00316               |
| SYV Valyl-tRNA synthetase                                                                  | 101.7          | 23         | 0.00165               |
| G6PI Glucose-6-phosphate isomerase                                                         | 50.4           | 23         | 0.00319               |
| RL25 50S ribosomal protein L25                                                             | 24.2           | 23         | 0.00664               |
| GYRB DNA gyrase subunit B                                                                  | 72.4           | 22         | 0.00215               |
| Q9WZT6 Putative uncharacterized protein                                                    | 16.8           | 21         | 0.00869               |
| SYA Alanyl-tRNA synthetase                                                                 | 98.0           | 20         | 0.00144               |
| PDXT Glutamine amidotransferase subunit pdxT                                               | 21.1           | 20         | 0.00661               |
| SYFB Phenylalanyl-tRNA synthetase beta chain                                               | 90.0           | 19         | 0.00150               |
| Q9WYE9 K <sup>+</sup> channel, beta subunit                                                | 36.1           | 19         | 0.00370               |
| Q9WZQ9 3-oxoacyl-(Acyl carrier protein) synthase II                                        | 43.8           | 19         | 0.00286               |
| RL17 50S ribosomal protein L17                                                             | 14.8           | 19         | 0.00901               |
| RL4 50S ribosomal protein L4                                                               | 26.6           | 19         | 0.00502               |

|                                                                    |       |    |         |
|--------------------------------------------------------------------|-------|----|---------|
| APT Adenine phosphoribosyltransferase                              | 19.7  | 19 | 0.00682 |
| Q9WZ98 Nucleotide sugar epimerase, putative                        | 39.1  | 19 | 0.00341 |
| LEU1 2-isopropylmalate synthase                                    | 56.8  | 19 | 0.00230 |
| CHEY Chemotaxis protein cheY                                       | 13.2  | 18 | 0.00932 |
| LEU22 3-isopropylmalate dehydratase large subunit 2                | 45.2  | 18 | 0.00268 |
| CSP Cold shock-like protein                                        | 7.4   | 18 | 0.01694 |
| METK S-adenosylmethionine synthetase                               | 43.6  | 18 | 0.00283 |
| KAD Adenylate kinase                                               | 25.1  | 18 | 0.00508 |
| Q9X1S9 Putative uncharacterized protein                            | 26.7  | 18 | 0.00453 |
| Q9WXU3 ComE protein, putative                                      | 145.1 | 17 | 0.00082 |
| Q9X0M4 Putative uncharacterized protein                            | 24.5  | 17 | 0.00491 |
| ACKA Acetate kinase                                                | 44.8  | 17 | 0.00262 |
| RS18 30S ribosomal protein S18                                     | 9.0   | 17 | 0.01408 |
| Q9X116 Putative uncharacterized protein                            | 12.5  | 16 | 0.00857 |
| Q9X2I7 Cold shock protein                                          | 7.6   | 16 | 0.01506 |
| PNP Polyribonucleotide nucleotidyltransferase                      | 78.6  | 15 | 0.00132 |
| Y370 UPF0273 protein TM_0370                                       | 26.8  | 15 | 0.00385 |
| LEU21 3-isopropylmalate dehydratase large subunit 1                | 45.4  | 15 | 0.00223 |
| REX2 Redox-sensing transcriptional repressor rex 2                 | 23.2  | 15 | 0.00457 |
| PURQ Phosphoribosylformylglycinamide synthase 1                    | 23.6  | 15 | 0.00437 |
| Q9WYK3 Putative uncharacterized protein                            | 16.2  | 14 | 0.00591 |
| HIS6 Imidazole glycerol phosphate synthase subunit hisF            | 27.7  | 14 | 0.00344 |
| PROA Gamma-glutamyl phosphate reductase                            | 46.4  | 14 | 0.00210 |
| Q9WY39 Putative uncharacterized protein                            | 17.3  | 14 | 0.00557 |
| Q9WYL1 NADH oxidase                                                | 47.6  | 14 | 0.00196 |
| Q9WXW2 Putative uncharacterized protein                            | 22.4  | 14 | 0.00458 |
| Q9WZM7 Phosphomannomutase                                          | 52.9  | 14 | 0.00185 |
| ILVD Dihydroxy-acid dehydratase                                    | 59.7  | 14 | 0.00157 |
| RL14 50S ribosomal protein L14                                     | 13.7  | 14 | 0.00713 |
| LEU3 3-isopropylmalate dehydrogenase                               | 39.1  | 14 | 0.00246 |
| Q9S5X2 Maltodextrin glycosyltransferase                            | 73.8  | 14 | 0.00136 |
| Q9X0J6 Putative uncharacterized protein                            | 10.7  | 14 | 0.00977 |
| GLPK2 Glycerol kinase 2                                            | 55.5  | 14 | 0.00175 |
| Q9S5W7 Putative uncharacterized protein                            | 29.1  | 14 | 0.00344 |
| RL27 50S ribosomal protein L27                                     | 9.2   | 14 | 0.01048 |
| IF2 Translation initiation factor IF-2                             | 77.7  | 13 | 0.00117 |
| RPOA DNA-directed RNA polymerase subunit alpha                     | 38.6  | 13 | 0.00240 |
| REX1 Redox-sensing transcriptional repressor rex 1                 | 22.9  | 13 | 0.00388 |
| LY41 Uncharacterized AIPM/Hcit synthase family transferase TM_0552 | 60.2  | 13 | 0.00150 |
| Q9X1E8 Putative uncharacterized protein                            | 15.3  | 13 | 0.00585 |
| CHEW Chemotaxis protein cheW                                       | 16.9  | 13 | 0.00535 |
| Q9X292 Putative uncharacterized protein                            | 12.1  | 13 | 0.00741 |
| Q9X1V4 DNA-directed DNA polymerase I                               | 102.1 | 13 | 0.00090 |
| Q9WZX2 Glutaredoxin-related protein                                | 25.1  | 13 | 0.00365 |
| UPP Uracil phosphoribosyltransferase                               | 23.3  | 13 | 0.00386 |
| Q9X1E5 Glycerol uptake operon antiterminator                       | 21.6  | 13 | 0.00414 |
| RL2 50S ribosomal protein L2                                       | 30.6  | 13 | 0.00293 |
| Q9WYK8 Putative uncharacterized protein                            | 23.5  | 13 | 0.00384 |
| CLPP ATP-dependent Clp protease proteolytic subunit                | 22.5  | 13 | 0.00398 |
| Q9WZD7 Putative uncharacterized protein                            | 22.3  | 12 | 0.00365 |
| Q9X0N2 Isocitrate dehydrogenase                                    | 45.4  | 12 | 0.00187 |
| RS11 30S ribosomal protein S11                                     | 14.1  | 12 | 0.00573 |
| Y398 Uncharacterized protein TM_0398                               | 42.6  | 12 | 0.00198 |
| Q9WXZ4 Putative uncharacterized protein                            | 12.8  | 12 | 0.00678 |

|                                                               |       |    |         |
|---------------------------------------------------------------|-------|----|---------|
| LEUD2 3-isopropylmalate dehydratase small subunit 2           | 18.4  | 12 | 0.00449 |
| Y1081 Putative anti-sigma factor antagonist TM_1081           | 12.9  | 12 | 0.00660 |
| Q9WZP2 Bacteriocin                                            | 30.1  | 12 | 0.00284 |
| Q9WY44 NADP-reducing hydrogenase, subunit D, putative         | 67.6  | 12 | 0.00123 |
| Q9X0D9 Endoglucanase                                          | 37.3  | 12 | 0.00220 |
| Q9WYM6 NADH oxidase, putative                                 | 47.0  | 11 | 0.00161 |
| Q7DFA3 Methyl-accepting chemotaxis protein, putative          | 31.6  | 11 | 0.00246 |
| Q9WZQ7 Putative uncharacterized protein                       | 33.6  | 11 | 0.00218 |
| RS8 30S ribosomal protein S8                                  | 15.3  | 11 | 0.00510 |
| Y1690 UPF0296 protein TM_1690                                 | 10.4  | 11 | 0.00743 |
| Q9WXV0 Putative uncharacterized protein                       | 18.7  | 11 | 0.00432 |
| Q9X102 Putative uncharacterized protein                       | 10.1  | 11 | 0.00785 |
| CHEA Chemotaxis protein cheA                                  | 75.5  | 11 | 0.00102 |
| RL30 50S ribosomal protein L30                                | 7.6   | 11 | 0.01020 |
| Q9X0Q6 Putative uncharacterized protein                       | 13.1  | 11 | 0.00584 |
| RS13 30S ribosomal protein S13                                | 14.4  | 11 | 0.00547 |
| SYT Threonyl-tRNA synthetase                                  | 74.5  | 11 | 0.00107 |
| K6PF 6-phosphofructokinase                                    | 34.4  | 11 | 0.00214 |
| DAPA Dihydrodipicolinate synthase                             | 32.4  | 10 | 0.00211 |
| Q9WZA6 Polysaccharide export protein, putative                | 109.5 | 10 | 0.00063 |
| DEOC Deoxyribose-phosphate aldolase                           | 27.2  | 10 | 0.00250 |
| HIS1 ATP phosphoribosyltransferase                            | 23.5  | 10 | 0.00299 |
| TIG Trigger factor                                            | 49.8  | 10 | 0.00146 |
| Q9WZL4 Putative uncharacterized protein                       | 45.2  | 10 | 0.00156 |
| RS3 30S ribosomal protein S3                                  | 24.0  | 10 | 0.00297 |
| Q9X0P7 2-oxoacid ferredoxin oxidoreductase, alpha subunit     | 61.4  | 10 | 0.00111 |
| Q9WXW6 Alcohol dehydrogenase, iron-containing                 | 42.6  | 10 | 0.00160 |
| Q9WZT5 Sugar kinase, pfkB family                              | 35.8  | 10 | 0.00195 |
| Q9WZZ4 Putative uncharacterized protein                       | 22.9  | 10 | 0.00309 |
| RS17 30S ribosomal protein S17                                | 12.6  | 10 | 0.00580 |
| RS6 30S ribosomal protein S6                                  | 15.3  | 10 | 0.00485 |
| Q9X285 Putative uncharacterized protein                       | 14.0  | 10 | 0.00513 |
| Q9X1L1 Aspartate-semialdehyde dehydrogenase                   | 36.6  | 10 | 0.00190 |
| RS19 30S ribosomal protein S19                                | 10.9  | 10 | 0.00654 |
| Q9WY58 Protein synthesis inhibitor, putative                  | 14.2  | 9  | 0.00437 |
| Q9X0P8 2-oxoacid ferredoxin oxidoreductase, beta subunit      | 31.7  | 9  | 0.00198 |
| Q9X0L2 Ferritin                                               | 19.3  | 9  | 0.00341 |
| Q9X103 Sugar ABC transporter, ATP-binding protein             | 41.5  | 9  | 0.00151 |
| Q9WY50 Putative uncharacterized protein                       | 23.3  | 9  | 0.00269 |
| Q9WZX3 Thioredoxin reductase                                  | 34.3  | 9  | 0.00176 |
| RS20 30S ribosomal protein S20                                | 11.3  | 9  | 0.00582 |
| Y1570 Uncharacterized protein TM_1570                         | 21.9  | 9  | 0.00291 |
| RL13 50S ribosomal protein L13                                | 17.3  | 9  | 0.00375 |
| Q9X0E0 Endoglucanase                                          | 36.0  | 9  | 0.00169 |
| RL24 50S ribosomal protein L24                                | 12.0  | 8  | 0.00473 |
| Q9X1V9 Beta-mannosidase, putative                             | 92.3  | 8  | 0.00063 |
| Q9X2I5 Putative uncharacterized protein                       | 14.5  | 8  | 0.00376 |
| Q9X0R2 Putative uncharacterized protein                       | 22.5  | 8  | 0.00252 |
| FABG 3-oxoacyl-[acyl-carrier-protein] reductase               | 26.4  | 8  | 0.00202 |
| DAPB Dihydrodipicolinate reductase                            | 23.7  | 8  | 0.00230 |
| AAT Aspartate aminotransferase                                | 42.4  | 8  | 0.00132 |
| Q9X0X1 Putative uncharacterized protein                       | 9.6   | 8  | 0.00606 |
| RL28 50S ribosomal protein L28                                | 7.8   | 8  | 0.00710 |
| FABZ (3R)-hydroxymyristoyl-[acyl-carrier-protein] dehydratase | 15.3  | 7  | 0.00317 |

|                                                                                               |       |   |         |
|-----------------------------------------------------------------------------------------------|-------|---|---------|
| Q9X2B2 Putative uncharacterized protein                                                       | 32.7  | 7 | 0.00151 |
| Q9WYM5 Putative uncharacterized protein                                                       | 27.3  | 7 | 0.00177 |
| Q9WXN4 Oligopeptide ABC transporter, ATP-binding protein                                      | 30.6  | 7 | 0.00162 |
| KHSE Homoserine kinase                                                                        | 31.3  | 7 | 0.00155 |
| RRF Ribosome recycling factor                                                                 | 21.5  | 7 | 0.00235 |
| DNLJ DNA ligase                                                                               | 78.8  | 7 | 0.00063 |
| Q9X1U8 ATP synthase F1, subunit delta                                                         | 21.5  | 7 | 0.00238 |
| HFQ Protein hfq                                                                               | 10.5  | 7 | 0.00473 |
| Y1468 UPF0230 protein TM_1468                                                                 | 32.5  | 7 | 0.00151 |
| SYS Seryl-tRNA synthetase                                                                     | 48.8  | 7 | 0.00102 |
| RS12 30S ribosomal protein S12                                                                | 14.0  | 7 | 0.00342 |
| PORD Pyruvate synthase subunit porD                                                           | 11.2  | 7 | 0.00439 |
| Q9X082 Putative uncharacterized protein                                                       | 115.7 | 6 | 0.00037 |
| Q9WXM6 NADP-reducing hydrogenase, subunit B                                                   | 14.0  | 6 | 0.00291 |
| Q9WXM4 Putative uncharacterized protein                                                       | 16.6  | 6 | 0.00262 |
| Q9X117 Iron-sulfur cluster-binding protein                                                    | 31.3  | 6 | 0.00129 |
| TRPA Tryptophan synthase alpha chain                                                          | 26.7  | 6 | 0.00156 |
| Q9X2C1 Putative uncharacterized protein                                                       | 34.4  | 6 | 0.00125 |
| Q9WZF4 Putative uncharacterized protein                                                       | 17.3  | 6 | 0.00250 |
| Q9WZ16 Threonine synthase                                                                     | 37.7  | 6 | 0.00107 |
| Q9X168 Inosine-5'-monophosphate dehydrogenase                                                 | 52.0  | 6 | 0.00077 |
| SAHH Adenosylhomocysteinase                                                                   | 44.8  | 6 | 0.00092 |
| Y508 UPF0189 protein TM_0508                                                                  | 67.4  | 6 | 0.00062 |
| Q9X176 Putative uncharacterized protein                                                       | 12.8  | 6 | 0.00321 |
| Q9X2B4 Putative uncharacterized protein                                                       | 93.4  | 6 | 0.00046 |
| Y1442 Putative anti-sigma factor antagonist TM_1442                                           | 12.3  | 6 | 0.00339 |
| Q9WZU7 Formiminotransferase-cyclodeaminase/formiminotetrahydrofolate cyclodeaminase, putative | 34.4  | 6 | 0.00123 |
| Q9X252 Outer membrane protein                                                                 | 43.7  | 6 | 0.00092 |
| Q9WZZ8 Galactose-1-phosphate uridylyltransferase                                              | 39.4  | 6 | 0.00111 |
| Q9S5X7 Fe-hydrogenase, subunit gamma                                                          | 18.3  | 6 | 0.00227 |
| ATPE ATP synthase epsilon chain                                                               | 12.3  | 6 | 0.00345 |
| Q9WXP0 Putative uncharacterized protein                                                       | 44.7  | 6 | 0.00094 |
| RL29 50S ribosomal protein L29                                                                | 7.9   | 6 | 0.00565 |
| Q9X1K6 Aspartokinase                                                                          | 43.8  | 6 | 0.00093 |
| RS14Z 30S ribosomal protein S14 type Z                                                        | 7.3   | 6 | 0.00611 |
| THYX Thymidylate synthase thyX                                                                | 26.0  | 6 | 0.00169 |
| RL31 50S ribosomal protein L31                                                                | 8.0   | 6 | 0.00525 |
| Q9WZH7 Purine-binding chemotaxis protein                                                      | 17.0  | 6 | 0.00245 |
| Q9X083 Putative uncharacterized protein                                                       | 129.3 | 5 | 0.00028 |
| RL23 50S ribosomal protein L23                                                                | 11.7  | 5 | 0.00311 |
| PANB 3-methyl-2-oxobutanoate hydroxymethyltransferase                                         | 29.7  | 5 | 0.00115 |
| Q9WZH5 Propionyl-CoA carboxylase, beta subunit                                                | 56.4  | 5 | 0.00060 |
| Q9WZY7 Putative uncharacterized protein                                                       | 20.1  | 5 | 0.00168 |
| Q9WYT2 Oligopeptide ABC transporter, periplasmic oligo-peptide binding protein, putative      | 70.7  | 5 | 0.00051 |
| Q9WYF6 Heavy metal binding protein                                                            | 7.8   | 5 | 0.00463 |
| ILVE Probable branched-chain-amino-acid aminotransferase                                      | 31.1  | 5 | 0.00114 |
| RL19 50S ribosomal protein L19                                                                | 13.4  | 5 | 0.00270 |
| Y763 UPF0145 protein TM_0763                                                                  | 11.4  | 5 | 0.00293 |
| PYRE Orotate phosphoribosyltransferase                                                        | 20.4  | 5 | 0.00166 |
| Q9WZT1 AstB/chuR-related protein                                                              | 55.8  | 5 | 0.00064 |
| RL22 50S ribosomal protein L22                                                                | 18.3  | 5 | 0.00195 |
| Q9X0R3 Putative uncharacterized protein                                                       | 20.3  | 5 | 0.00173 |
| OMPA Outer membrane protein alpha precursor                                                   | 45.3  | 5 | 0.00078 |

|                                                                                     |      |   |         |
|-------------------------------------------------------------------------------------|------|---|---------|
| RL18 50S ribosomal protein L18                                                      | 14.0 | 5 | 0.00255 |
| Y964 UPF0272 protein TM_0964                                                        | 45.0 | 5 | 0.00077 |
| Q9X211 Putative uncharacterized protein                                             | 14.3 | 5 | 0.00250 |
| Q9X208 Putative uncharacterized protein                                             | 7.9  | 5 | 0.00463 |
| SYD Aspartyl-tRNA synthetase                                                        | 66.4 | 5 | 0.00054 |
| Q9WZP3 Putative uncharacterized protein                                             | 13.3 | 5 | 0.00272 |
| AROE Shikimate dehydrogenase                                                        | 28.9 | 5 | 0.00123 |
| RL15 50S ribosomal protein L15                                                      | 16.2 | 5 | 0.00211 |
| Q9X076 Putative uncharacterized protein                                             | 13.1 | 5 | 0.00263 |
| Q9WYU2 Putative uncharacterized protein                                             | 27.2 | 5 | 0.00134 |
| FER Ferredoxin                                                                      | 6.2  | 5 | 0.00518 |
| CH10 10 kDa chaperonin                                                              | 10.3 | 4 | 0.00270 |
| Q9X118 Iron-sulfur cluster-binding protein, putative                                | 30.7 | 4 | 0.00088 |
| Q9X2G7 Putative uncharacterized protein                                             | 34.2 | 4 | 0.00084 |
| FTSZ Cell division protein ftsZ                                                     | 38.3 | 4 | 0.00071 |
| Y466 UPF0082 protein TM_0466                                                        | 28.4 | 4 | 0.00098 |
| Q9X2F2 Transposase                                                                  | 15.1 | 4 | 0.00193 |
| PYRF Orotidine 5'-phosphate decarboxylase                                           | 22.8 | 4 | 0.00124 |
| PUR6 Phosphoribosylaminoimidazole carboxylase catalytic subunit                     | 18.6 | 4 | 0.00145 |
| Q9WZF2 DNA polymerase III, gamma and tau subunit                                    | 54.8 | 4 | 0.00052 |
| Q9WZ52 Lipopolysaccharide biosynthesis protein                                      | 48.6 | 4 | 0.00057 |
| CHEX CheY-P phosphatase cheX                                                        | 16.4 | 4 | 0.00160 |
| Q9X091 Putative uncharacterized protein                                             | 8.5  | 4 | 0.00311 |
| Q9WXN1 Laminarinase                                                                 | 72.5 | 4 | 0.00039 |
| Q9WXS1 2-dehydro-3-deoxyphosphogluconate aldolase/4-hydroxy-2-oxoglutarate aldolase | 22.2 | 4 | 0.00121 |
| AROA 3-phosphoshikimate 1-carboxyvinyltransferase                                   | 45.3 | 4 | 0.00061 |
| RIMM Probable 16S rRNA-processing protein rimM                                      | 20.4 | 4 | 0.00141 |
| Q9WXM7 NADP-reducing hydrogenase, subunit A                                         | 19.9 | 4 | 0.00141 |
| SYE1 Glutamyl-tRNA synthetase 1                                                     | 54.6 | 4 | 0.00053 |
| MINC Probable septum site-determining protein minC                                  | 22.7 | 4 | 0.00118 |
| Q9X2B1 Putative uncharacterized protein                                             | 27.9 | 4 | 0.00102 |
| Q9X2F4 Cyclomaltodextrinase, putative                                               | 55.1 | 4 | 0.00053 |
| Q9WZU0 Cell division protein FtsA, putative                                         | 47.0 | 4 | 0.00059 |
